# Supplementary material for: Single-cell transcriptome analysis of endometrial tissue
Source: PubMed Central journal article supplement — Hum Reprod. 2016 Feb 13;31(4):844–53. doi: 10.1093/humrep/dew008 (PMC4791917; doi:10.1093/humrep/dew008), 2016-02-13
Supplement: supp_dew008_dew008supp_fig1.pdf [file supp_dew008_dew008supp_fig1.pdf]

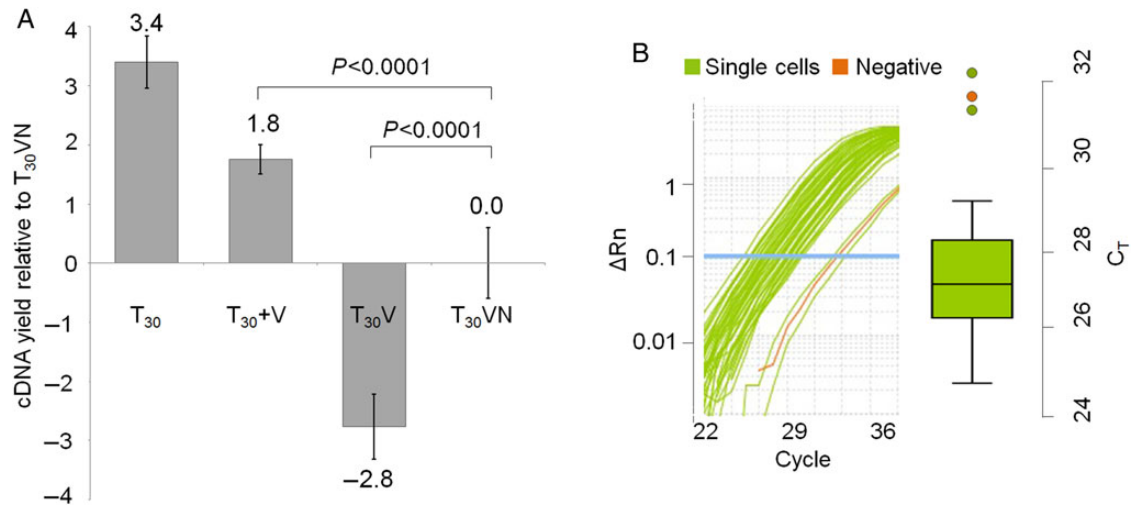

**Supplementary Figure S1** Oligo-T primer comparison and single-cell FACS quality control. **(A)** Average yield of synthesized cDNA using different oligo-T primers, relative to those obtained using the oligo-T<sub>30</sub>VN oligo. Full sequences are provided in Supplementary Table S1. **(B)** Single secretory biopsy stromal cells were lysed and template-switching mediated reverse transcription was used to generate cDNA. Of the total volume of single-cell cDNA, 10% was used for FACS accuracy and cDNA synthesis QC. A typical QC layout showing that the RNA from the majority of sorted cells is converted successfully to cDNA. The negative control had a significantly higher C<sub>T</sub> value and clustered with two samples, suggesting that the cells in those wells most likely did not reach to the lysis buffer during the FACS procedure. The negative C<sub>T</sub> value would have been even higher if artificial spike-in molecules had not been used in the mastermix.
