# Supplementary material for: Single-cell transcriptome analysis of endometrial tissue
Source: PubMed Central journal article supplement — Hum Reprod. 2016 Feb 13;31(4):844–53. doi: 10.1093/humrep/dew008 (PMC4791917; doi:10.1093/humrep/dew008), 2016-02-13
Supplement: supp_dew008_dew008supp_fig2.pdf [file supp_dew008_dew008supp_fig2.pdf]

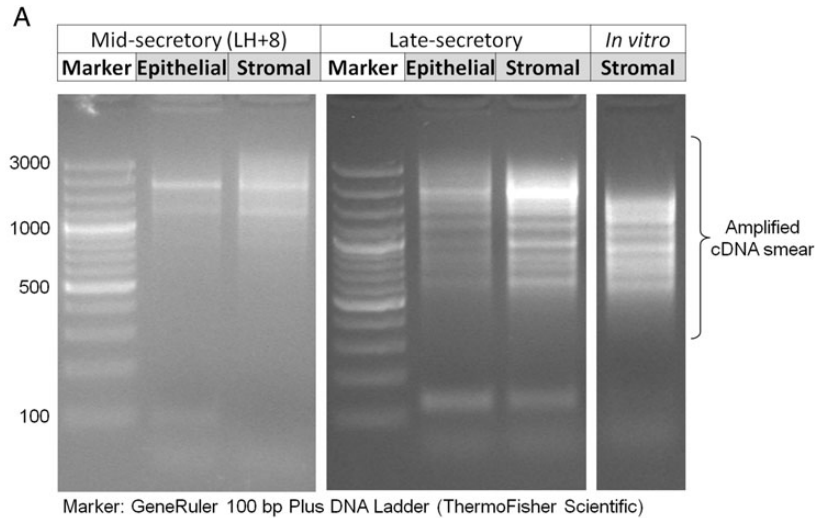

**B**

|                                       | Mid-secretory (LH+8) |               | Late-secretory |               | <i>In vitro</i> |
|---------------------------------------|----------------------|---------------|----------------|---------------|-----------------|
|                                       | Epithelial           | Stromal       | Epithelial     | Stromal       | Stroma          |
| Raw reads per cell                    | 3 804 806            | 3 996 306     | 3 046 911      | 2 868 949     | 3 224 877       |
| Low quality read rate (%)             | 10.14                | 13.60         | 11.37          | 12.69         | 13.01           |
| Improper STRT read rate (%)           | 10.86                | 9.43          | 9.70           | 9.69          | 8.80            |
| <b>PCR redundancy</b>                 | <b>144.48</b>        | <b>81.43</b>  | <b>57.27</b>   | <b>41.16</b>  | <b>38.82</b>    |
| Qualified reads per cell              | 20 854               | 36 868        | 38 840         | 53 326        | 63 590          |
| Mapped rate (%)                       | 56.85                | 73.68         | 60.93          | 77.14         | 82.52           |
| <b>Mapped reads per cell (median)</b> | <b>6 330</b>         | <b>21 486</b> | <b>7 223</b>   | <b>37 298</b> | <b>55 974</b>   |
| Spike-in reads per cell               | 1 897                | 1 268         | 540            | 305           | 151             |
| 5'-end capture rate (spike-in, %)     | 97.69                | 99.18         | 97.23          | 96.36         | 96.65           |
| 5'-end capture rate (mRNA, %)         | 57.02                | 40.53         | 72.84          | 70.69         | 86.36           |

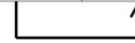

**Supplementary Figure S2** Single-cell quality control on agarose gel and by RNA-seq. **(A)** Pooled single-cell cDNAs are amplified by PCR and loaded on 2% agarose TAE gel for QC. Equal cDNA broad smear is expected from 0.2–5 Kb range. **(B)** Epithelial and stromal cells from two biopsies were sequenced on one Illumina HiSeq2000 lane. Stromal cells from late secretory biopsy were cultivated and analysed in parallel (pointed by arrow). The description of all measured RNA-seq QC parameters are described in <https://github.com/shka/STRTprep>.
