# Supplementary material for: Single-cell transcriptome analysis of endometrial tissue
Source: PubMed Central journal article supplement — Hum Reprod. 2016 Feb 13;31(4):844–53. doi: 10.1093/humrep/dew008 (PMC4791917; doi:10.1093/humrep/dew008), 2016-02-13
Supplement: supp_dew008_dew008supp_text2.pdf [file supp_dew008_dew008supp_text2.pdf]

---

## Supplementary Text SII

DEFAULTS: &defaults

UMI: 4

BARCODE: 6

GAP: 3

CDNA: 37

LAYOUT: src/barcodes.old.txt

PHYX:

GENOMESPIKERIBO: src/ebwt/hg19\_ercc92\_ynbA\_u13369/ref

TRANSCRIPT: src/ebwt/hg19\_refGene/ref

FLUCTUATION: 0.05

DIFFEXP: 0.05

LIBS:

SARMB:

<<: \*defaults

FASTQS:

- src/150221\_SN670\_0304\_AC655YACXX-lane7\_NoIndex\_L007\_R1\_001.fastq.gz
- src/140528\_SN653\_0292\_AC4WG4ACXX-lane6\_NoIndex\_L006\_R1\_001.fastq.gz

SARMC:

<<: \*defaults

FASTQS:

- src/150221\_SN670\_0304\_AC655YACXX-lane8\_NoIndex\_L008\_R1\_001.fastq.gz
- src/140528\_SN653\_0292\_AC4WG4ACXX-lane8\_NoIndex\_L008\_R1\_001.fastq.gz
