# Supplementary figures and images for: Single-cell transcriptome analysis of endometrial tissue
Source: PubMed Central journal article supplement — Hum Reprod. 2016 Feb 13;31(4):844–53. doi: 10.1093/humrep/dew008 (PMC4791917; doi:10.1093/humrep/dew008), 2016-02-13

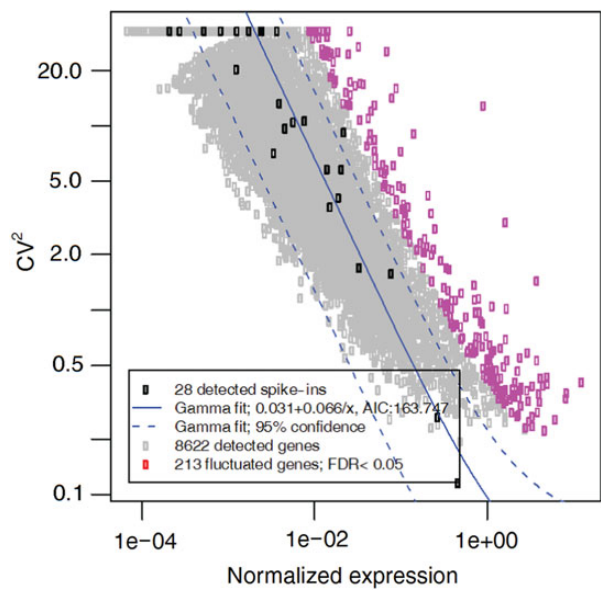

**Supplementary Figure S3** Estimation of fluctuation among cultured cells.

Supplement: supp_dew008_dew008supp_fig3.pdf [file supp_dew008_dew008supp_fig3.pdf]
